# Supplementary material for: Cloud properties over the Southern Ocean during the MARCUS field campaign
Source: Copernicus journal article supplement (doi:10.5194/amt-2021-388), 2022-01-17
Supplement: Supplementary file [file amt-2021-388-AC1-supplement.pdf]

**Thanks for your suggestions and comments. Please find our point-to-point response in blue color.**

**Response to RC1's Comments:**

Line 1: The title specifies this study as “Cloud properties over the Southern Ocean During the MARCUS field campaign”. The “cloud properties” is a broad description including macrophysics, microphysics and dynamics, etc. However, the focus of this work is on the investigation of the macrophysics distribution and the cloud phase characteristics. I suggest using a more specific title to be consistent with the scope of the manuscript.

Good suggestion, we have changed out title to ‘Cloud phase and macrophysical properties over the Southern Ocean during the MARCUS field campaign’

Line 17: It seems that cloud type is classified with ambiguity. Low-level clouds are identified based on the cloud altitude, while shallow cumulus clouds are classified with their morphology and height. I would prefer to consider the shallow cumulus are a subgroup of low-level clouds instead of a separated group. In the manuscript the authors only use cloud height to identify the shallow/deep cumulus, which is not sufficient. I suggest a thorough revision of these terminologies and use them consistent in the manuscript to avoid any confusion. Specifically, I suggest using low/middle/high clouds and avoid the “cumulus” category unless a more specific cumulus classification algorithm is being added in the manuscript.

The cloud type classification method was from Xi et al., 2010. Since the ground/ship-based measurements cannot provide cloud 3-D structures, we are trying to classify the clouds only depending on the time series. The original idea of Xi et al. (2010) came from Hogan et al. (2000), and the purpose of the study was to match the temporal measurement (ground-based) with spatial measurement/simulation (Satellite/Model). Therefore, the classification can depend on either height or pressure level. Kennedy et al. (2010) used the same classification method to evaluate the NASA GISS SCM cloud fraction, this method is quite successful in comparing temporal measurement to areal measurements/simulations.

You are right, we did not use a separate algorithm to classify the cumulus, and we modified our manuscript to avoid ‘cumulus’ for MOL clouds

Xi, B., Dong, X., Minnis, P. and Khaiyer, M. M.: A 10 year climatology of cloud fraction and vertical distribution derived from both surface and GOES observations over the DOE ARM SPG site, *J. Geophys. Res. Atmos.*, doi:10.1029/2009JD012800, 2010

Hogan, R. J., and A. J. Illingworth (2000), Deriving cloud overlap statistics from radar, *Q. J. R. Meteorol. Soc.*, 126, 2903–2909, doi:10.1002/qj.49712656914.

Kennedy, A. D., X. Dong, B. Xi, P. Minnis, A. Del Genio, A. B. Wolf, and M. M. Khaiyer (2010), Evaluation of the NASA GISS single column model simulated clouds using combined surface and satellite observations, *J. Clim.*, doi:10.1175/2010JCLI3353.1

Line 134: Does the cloud occurrence frequency shown in Figure 2 sensitive to the length of the time window? If so, why use 5 min?

The answer is yes. Figure 3 of Xi et al. (2010) has demonstrated how the cloud frequency (FREQ) and amount (amount when present (AWP)) vary with different temporal resolutions (as well as vertical resolutions). Figure 3 shows that although the FREQ and AWP from different temporal

resolutions have similarly shaped vertical distributions, the  $FREQ$  values increase and the  $AWP$  values decrease as the averaging period increases from 5 min to 6 h. However, the cloud fraction ( $CF = FREQ * AWP$ ) keeps a constant (the time has to smaller than the lifetime of each type, which will be hard to know unless we have satellite data available to match the areal measurement, like what we did to match the GOES 0.5-hour measurements in Xi et al., 2010).

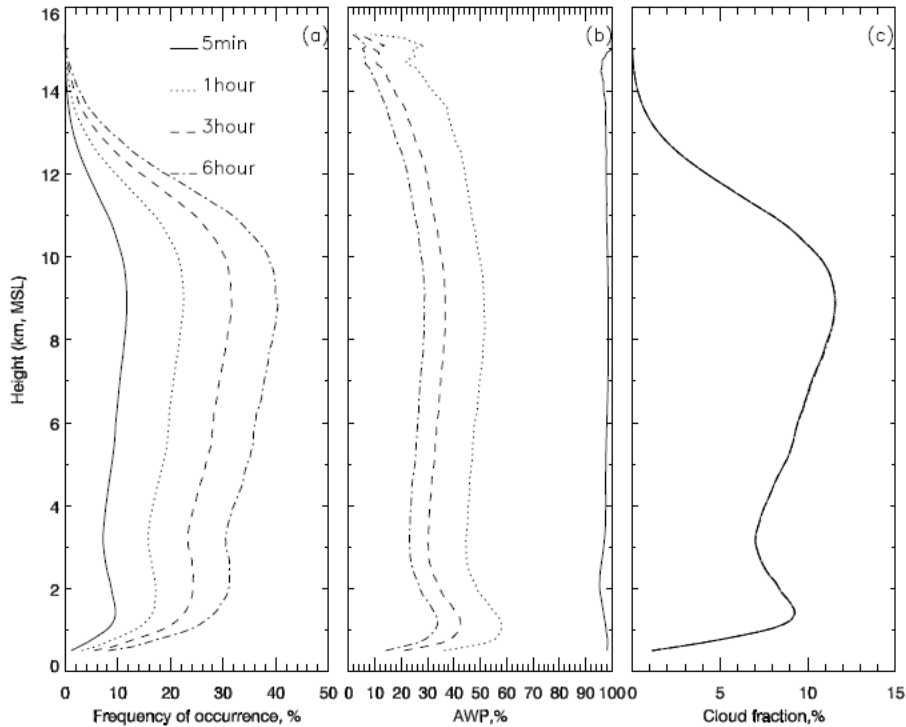

Figure 3. Mean vertical distributions of (a)  $FREQ$ , (b)  $AWP$ , and (c)  $CF$  derived from the ARM radar-lidar pair observations with a vertical resolution of 90 m and temporal resolutions of 5 min, 1 h, 3 h, and 6 h at the ARM SGP site, 1997–2006.

Line 188 also mentions the relative low cloud fractions compared to Satellite results is due to the inconsistent resolution. Adapting the wind speed from sounding, a reasonable “equivalent temporal resolution” of the surface-based radar may be obtained. For example, considering the windspeed as 10m/s, a 2-grid box (~200km) corresponding to approximately 5.5hours of the radar observation (not considering the speed of ship). Thus, does the cloud frequency estimated from a longer time window is closer to the spaceborne results? I’m not suggesting performing a sensitive test for Fig.2, but just want to remind the authors that it is necessary to discuss this issue furthermore for the presented results to be better used for model validation, as the authors mentioned in the introduction.

Yes, we added more discussions in the revision regarding to Figure 2 based on the conclusion in Xi et al. (2010).

Figure 1 of Xi et al. (2010) has illustrated the temporal-spatial  $CF$  comparison between ARM SGP ground-based and GOES satellite. We concluded that the 0.5-hr averaged ARM  $CF$ s agreed well with  $0.5^\circ$  GOES observations, while 4-hr averaged ARM  $CF$ s matched well with  $2^\circ$  GOES results.

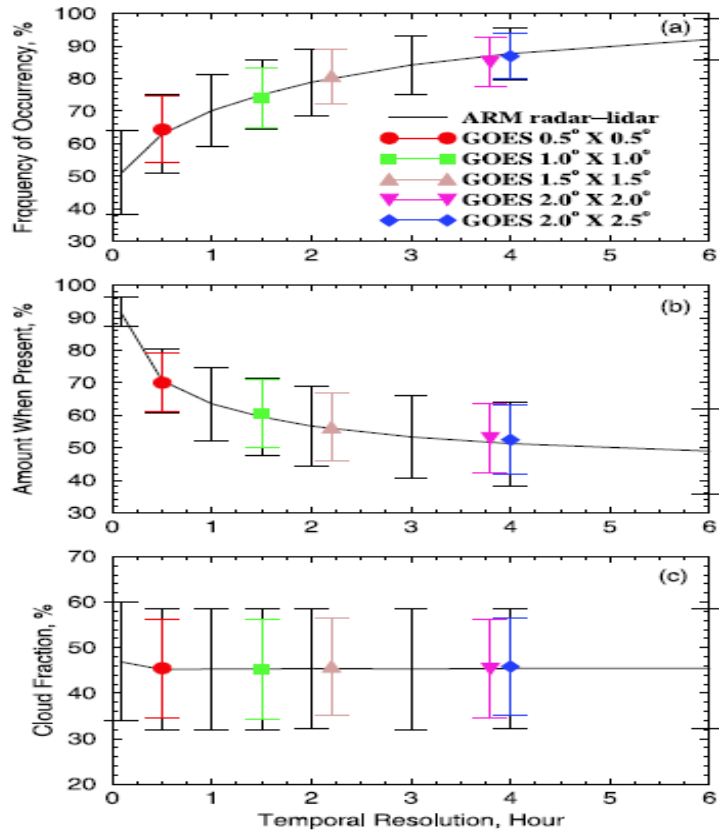

**Figure 1.** Dependence of (a) cloud frequency of occurrence (FREQ), (b) amount when present (AWP), and (c) cloud fraction (CF) on temporal resolutions of Atmospheric Radiation Measurement Program (ARM) surface radar–lidar observations during the period 1997–2006 and on grid boxes of satellite observations during the period from May 1998 to December 2006 at the ARM Southern Great Plains (SGP) site.

Line 200: How close? What is the specific CF from Listowski et al, 2019?

This statement is based on the comparison of the color bars of Figures 7 & 9 in Listowski et al. (2019). The low clouds (below 3 km) are dominated in SON and DJF in this study compared to the Listowski et al. (2019) defined Weddell Sea sector (WSS) and Amundsen–Ross sector (ARS regions) in the SO, especially the ARS region is the MARCUS experiment domain.

Line 214: I also mentioned in the previous comment. The classified cloud type is solely based on cloud height, it is not clear why the MOL is related to shallow cumulus.

Changed ‘shallow cumulus’ to MOL in this revision.

Line 215: Are you referring to occurrence frequency is higher?

Yes, we rephrased the sentence for clarifying. Thanks.

Line 226: For Figure 3. Why use the deepest cloud thickness instead of the mean/median thickness? It is hard to interpret the thickness distribution in a statistical perspective as the deepest thickness may be the results of two “outliers” of the cloud in each group. Besides, I suggest using the box plot to present the results shown in Fig. 3b.

Thanks for the suggestion. The purpose of Figure 3b is to show where is mean cloud boundary for

each selected category. The bars in Figure 3b are the mean values listed in Table 2, that is, the mean thickness for each category except for HOL. The sentence is changed in the revision as: Figure 3b shows the vertical locations of different types of cloud layers, which represent the mean  $H_{\text{top}}$  and  $H_{\text{base}}$  listed in Table 2 for any type of cloud.

Line 232: How the stability is estimated and what is the value for NSO?

The stability is estimated by the LTS calculated from the potential temperature difference between the surface and 700 hPa based on the ERA-Interim reanalysis during the time periods when the low-level clouds appeared along the ship tracks. The boundary layer over NSO is relatively more stable than over SSO based on lower troposphere stability (LTS) analysis (12.2-15.32 K over NSO vs. 11.48-13.29 K over SSO).

Line 235: ...HGH and HOM peak “are” less than  $10 \text{ g m}^{-2}$   
Thanks, it is changed.

Line 241: Same as before, the shallow convective clouds are not clearly identified.  
You are right, we removed the ‘shallow convective’ MOL clouds.

Line 248: Table1: Compared to the mean LWP, the std (uncertainty) is too large and indicates the result is statistically insignificant. This may be due to the insufficient MWR observations being collected in the analysis. Have you considered the period when MWR is wet and thus the LWP retrieval becomes unreliable? The maximum LWP value ( $1937 \text{ g m}^{-2}$ ) seems too large to be accurately retrieved by MWR.

The max values of LWP from statistical method are much greater than what we used. We understand the wet dome may cause bias, and thus performed a sensitivity study in Tian et al., (2019) for shallow and deep convective clouds and concluded that the MWR retrieved cloud LWPs are reasonable as long as the rain rate  $< 2 \text{ mm/hr}$ , that is, the wet dome is insignificant for Rain Rate  $< 2 \text{ mm/hr}$ .

Tian, J., X. Dong, B. Xi, C.R. Williams, and P. Wu, 2019: Estimation of Liquid Water Path in Stratiform Precipitation Systems using Radar Measurements. *Atmos. Meas. Tech.* 12, 3743–3759, <https://doi.org/10.5194/amt-2018-388>.

Line 250: Does the “non-contiguous clouds” refers to multi-layer clouds?  
Yes.

Line 251-252: Please add the corresponding statistics in Table 1 to support this statement.  
In column 7 of Table 2, we include both single- and multi-layered statistics for the HML clouds.

Line 266: Same as before, I suggest using the mean cloud thickness instead of the “maximum” cloud thickness before making further statements.  
We have explained the reasons to use the max cloud top and min cloud base in last question.

Line 288:290: What is the meaning of the “majority of WID?” Why not using the mean/median WID? What is the radar temporal resolution?  
We did use in-site measurements to calculate the mean WID while ice particles present, which

value is 0.52 m/s. The reason using ‘majority of WID’ is that we have to determine the dominant phase in each 5-minute. Since not all the measurements have 10-s data, we have to process all the measurements into 5-minute resolution.

Line 292: And or “or”?

Changed to ‘or’, thanks for catching our mistake.

Line 289L Any supporting information regarding on the chosen of 0.4m/s of WID?

When the 2DS detected the ice particles, the WID from in-situ radar usually are  $>0.4$  m/s.

Line 288-Line 294: Please rephrase the description of the classification algorithm, which is not consistent with Figure 5.

We revised Figure 5.

Line 293: LWP threshold ( $10 \text{ gm}^{-2}$ ) from the manuscript and Figure 5 ( $20 \text{ g m}^{-2}$ ) is not consistent. Thanks for catching our mistake, the figure 5 has changed to  $10 \text{ gm}^{-2}$ .

Line 305-310: Not quite understand why this analysis is helpful to validate the proposed classification algorithm.

We are trying to integrate all 1-s in-situ measurements into different temporal resolutions to mimic the radar observations. Since the in-situ cloud microphysical measurements can tell us the phase of the cloud, it allows us to see the percentage variations of cloud phase, by changing integration time of in-situ sampling to mimic what the radar may observe the cloud for each range volume.

Line 315: I cannot tell the backscatter difference for Fig.6e, please adjust the color bar range to make the figure more distinguishable. Also, the backscatter unit is missing.

We add the unit and replot it.

Line 321-323: From Fig. 6c, the identified ice period from radar around 22 UTC corresponding to low LDR value in Fig 6.d, which seems contradictory to this statement.

In the revised plot, Fig. 6d clearly shows  $\text{LDR} > 0.1$  for both mixed-phase and ice clouds.

Line 337-339: It is necessary to present the SOCRATES results if this can further support the classification output. One thing should be considered for the onboard radar is that the Doppler spectrum width may be much higher than the surface-based radar as for the enhanced Doppler spectrum broadening caused by the moving of aircraft.

Thanks for the suggestion, we did include the SOCRATES analysis in Table 2b. We talked the Doppler effect in our ATMO physics classes and understood that it is relative to movement in the same direction. We also did some research to use ARM ground-based observed Doppler velocity and spectrum for retrieving cloud microphysical properties (Fig. 3 of Tian et al., 2019; Wu et al., 2020). In this study, the onboard radar sends the signals (assuming the time of transmitted and received signals is short enough comparing to aircraft speed) in the perpendicular to the movement of the aircraft, that is, there is no relative movement between radar signals and clouds. So we are not sure how we can quantitatively estimate the Doppler broadening in this study. Please let us know if you have more suggestions on the order of magnitude. Thanks.

Line 345-346: What is the difference between mixed-phase and “other” clouds?

‘Other’ is also mixed-phase cloud but have different vertical distribution of liquids in it, compared to the ‘mix-phase’ cloud. We think it will be very interesting to include it in a stand-alone group. We will give a clearer definition about “Other” in the revision.

Line 364: Drizzle is one kind of the liquid water droplets; why drizzle occurs in ice cloud?

From radar reflectivity, we can only tell there are effective radar reflectivity below the cloud base (defined by ceilometer/MPL), we account these actively falling particles as ‘drizzle’, which could be ice crystals. We revise it in the manuscript to clarify that. Thanks for your suggestion.

Line 411-Line 413: This comparison only make scene if the cloud phase classification algorithm is same for these two studies.

Yes, the cloud phase classification algorithm is almost identical. The algorithm used in this study is very similar to the method of Shupe et al. (2005) which was developed based ARM NSA datasets. The comparison between this study with Shupe’s one is listed in Table 2a.

The vertical distributions of the radar reflectivity over ARM NSA site could be quite different from those during MARCUS. The most outstanding characteristic of Arctic mixed-phase clouds (also low clouds) is featured with the liquid-topped cloud layer with ice cloud layer beneath (Qiu et al. 2015). When we looked day-by-day radar image and cannot find any long-lasting liquid-topped mixed-phase cloud layers during MARCUS. This is the largest difference between two regions.

Qiu, S., X. Dong, B. Xi. J. Li, 2015: Characterizing Arctic mixed-phase cloud structure and its relationship with humidity and temperature inversion using ARM NSA Observations. *JGR*, 120, 7737-7746, doi:10.1002/2014JD023022.

Line 417: Radar reflectivity need to be calibrated before used for analysis. (Mace., 2021)

We have personally contacted the ASR data management team regarding that. They are aware of the radar reflectivity during MARCUS has low bias but don’t know exactly how much lower. We just try our best to get an estimation here.

Line 429: This statement is valid only if the vertical air velocity is negligible compared to the terminal velocity of cloud/ice particles.

Yes, you are right, it is hard to get vertical air velocity when the particle moves the same direction as air. However, drizzle forms frequently in liquid clouds, and the drizzle falls actively downward, which enhances downdraft. In our understanding, the vertical velocity of cloud droplets ( $r < 20 \mu\text{m}$ ) is similar to air vertical motion, while for large drizzle drops and ice crystals ( $> 100 \mu\text{m}$ ) their terminal fall velocity should be much larger than air motion. In this situation, we can treat the radar Doppler velocity as drizzle or ice crystal terminal fall velocity with small uncertainty. We will include this discussion in the revision to clarify this point.
